# Supplementary material for: Gut Microbiome Diversity and Abundance Correlate with Gray Matter Volume (GMV) in Older Adults with Depression
Source: MDPI journal article supplement (doi:10.3390/ijerph19042405), 2022-02-19

**Figure S1.** Scatter plots of GMV association with fecal microbial alpha diversity as measured by Chao1, Faith's PD, and Shannon index. GMV regions include hippocampus, amygdala, nucleus accumbens and pericalcarine (control).

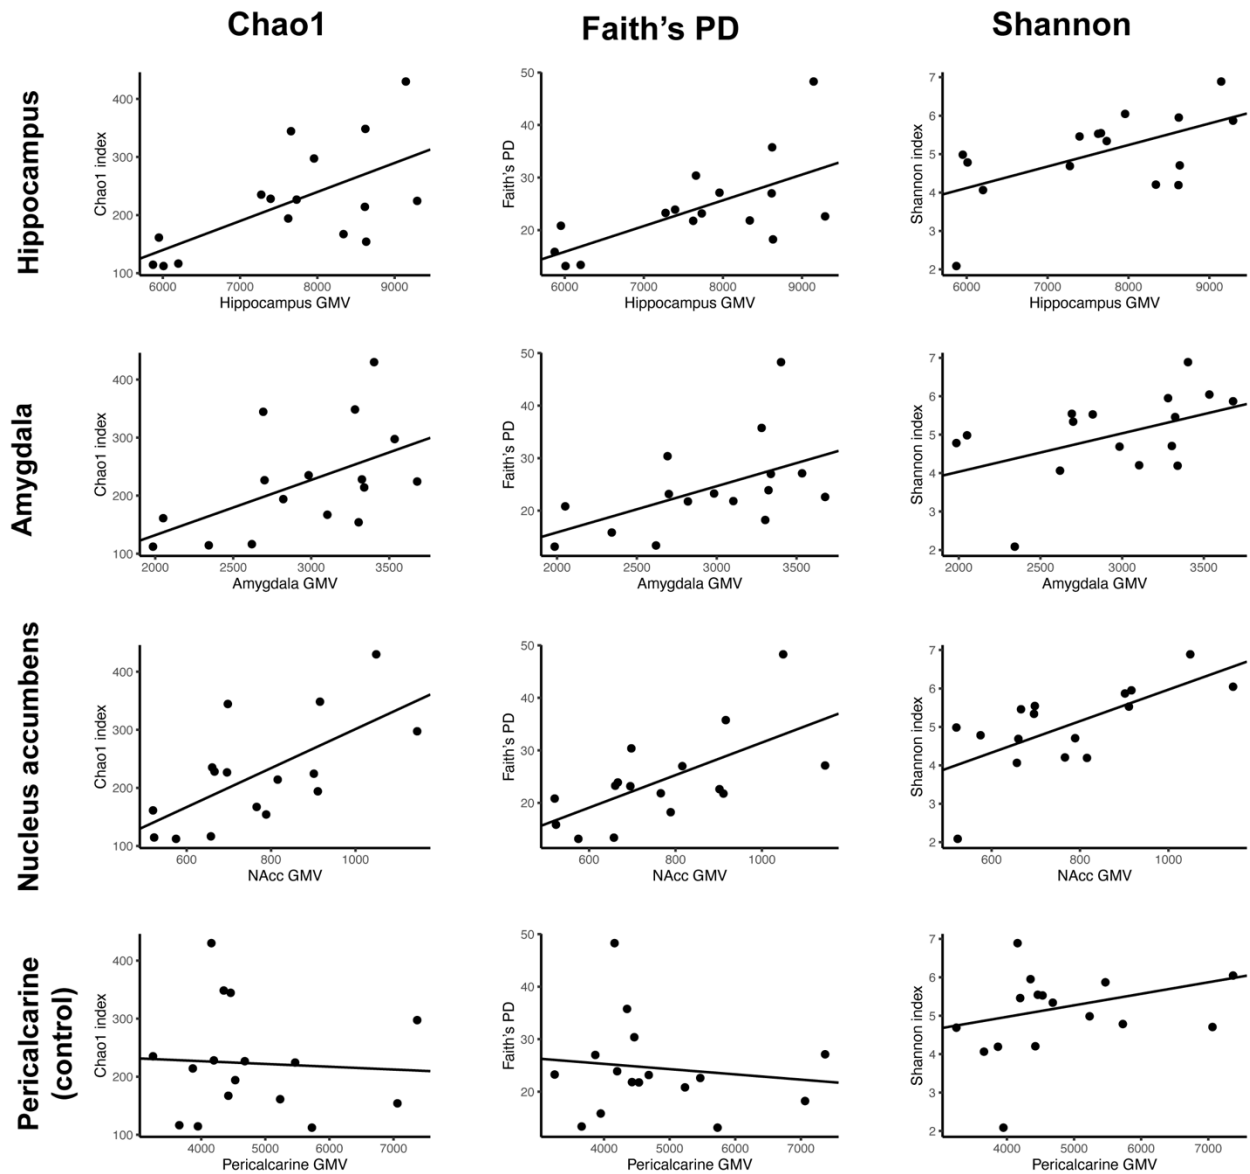

Supplement: s1 [file s1]
