# Supplementary material for: Gut Microbiome Diversity and Abundance Correlate with Gray Matter Volume (GMV) in Older Adults with Depression
Source: MDPI journal article supplement (doi:10.3390/ijerph19042405), 2022-02-19
Supplement: s1 [file s1]

**Table S2.** Univariable testing of individual variable association with alpha diversity measures.

| Variable     | Chao1                             | Faith's PD          | Shannon             |
|--------------|-----------------------------------|---------------------|---------------------|
| Age          | <b>R = -.54</b><br><b>p = .03</b> | R = -.5<br>p = .05  | R = -.39<br>p = .14 |
| Sex          | D = .26<br>p = .62                | D = .13<br>p = .79  | D = -.35<br>p = .54 |
| Education    | R = -.27<br>p = .32               | R = -.38<br>p = .15 | R = -.17<br>p = .54 |
| Age of Onset | R = -.51<br>p = .05               | R = -.49<br>p = .06 | R = -.09<br>p = .75 |
| BMI          | R = -.21<br>p = .43               | R = -.06<br>p = .82 | R = -.38<br>p = .15 |
| MMSE         | R = .17<br>p = .52                | R = .21<br>p = .43  | R = -.25<br>p = .36 |
| MADRS        | R = -.01<br>p = .96               | R = -.03<br>p = .93 | R = -.21<br>p = .44 |
| HAMD         | R = .11<br>p = .69                | R = .15<br>p = .58  | R = -.19<br>p = .49 |

R=Pearson's correlation coefficient; D=Cohen's d; BMI = Body Mass Index; MMSE = Mini-Mental State Examination; MADRS = Montgomery-Åsberg Depression Rating Scale; HAMD = Hamilton Depression Rating Scale (24 item). P-values calculated by t-test or Pearson's correlation. Bolded: P-value less than 0.05 or absolute D-value greater than 0.8.
