# Supplementary material for: Gut Microbiome Diversity and Abundance Correlate with Gray Matter Volume (GMV) in Older Adults with Depression
Source: MDPI journal article supplement (doi:10.3390/ijerph19042405), 2022-02-19
Supplement: s1 [file s1]

**Table S3.** Individual microbial genera association with regional GMV by multivariable linear regression with age and sex as covariates.

| Brain Region       | Genus                                                                                                           | $\beta$      | p-value          |
|--------------------|-----------------------------------------------------------------------------------------------------------------|--------------|------------------|
| Hippocampus        | p__Bacteroidetes; c__Bacteroidia; o__Bacteroidales;<br>f__Muribaculaceae; g__                                   | .421         | .189             |
| Hippocampus        | p__Firmicutes; c__Clostridia; o__Clostridiales;<br>f__Clostridiaceae_1; g__Clostridium_sensu_stricto_1          | .443         | .097             |
| <b>Hippocampus</b> | <b>p__Firmicutes; c__Clostridia; o__Clostridiales;<br/>f__Family_XIII; g__Family_XIII_AD3011_group</b>          | <b>.700</b>  | <b>.024*</b>     |
| <b>Hippocampus</b> | <b>p__Firmicutes; c__Clostridia; o__Clostridiales;<br/>f__Ruminococcaceae; g__</b>                              | <b>.856</b>  | <b>.002**</b>    |
| <b>Hippocampus</b> | <b>p__Firmicutes; c__Clostridia; o__Clostridiales;<br/>f__Ruminococcaceae; g__Oscillibacter</b>                 | <b>.805</b>  | <b>.001**</b>    |
| Hippocampus        | p__Firmicutes; c__Clostridia; o__Clostridiales;<br>f__Ruminococcaceae; g__Ruminococcaceae_UCG-010               | .483         | .154             |
| Hippocampus        | p__Firmicutes; c__Clostridia; o__Clostridiales;<br>f__Ruminococcaceae; g__Subdoligranulum                       | .559         | .090             |
| <b>Amygdala</b>    | <b>p__Firmicutes; c__Clostridia; o__Clostridiales;<br/>f__Lachnospiraceae; g__Lachnospiraceae_NK4A136_group</b> | <b>.897</b>  | <b>.017*</b>     |
| <b>Amygdala</b>    | <b>p__Firmicutes; c__Clostridia; o__Clostridiales;<br/>f__Ruminococcaceae; g__Oscillibacter</b>                 | <b>1.055</b> | <b>.00008***</b> |
| NAcc               | p__Bacteroidetes; c__Bacteroidia; o__Bacteroidales;<br>f__Muribaculaceae; g__                                   | .361         | .336             |
| NAcc               | p__Firmicutes; c__Clostridia; o__Clostridiales;<br>f__Clostridiaceae_1; g__Clostridium_sensu_stricto_1          | .461         | .138             |

Normalized count of individual genera identified from DESeq2 analysis (depicted in Figure 2A) were regularized log transformed (rlog) for the linear regression. GMV regions include hippocampus, amygdala, and nucleus accumbens.  $\beta$  = standardized regression coefficient. P-value less than 0.05 uncorrected are bolded.
