# Supplementary material for: Gut Microbiome Diversity and Abundance Correlate with Gray Matter Volume (GMV) in Older Adults with Depression
Source: MDPI journal article supplement (doi:10.3390/ijerph19042405), 2022-02-19
Supplement: s1 [file s1]

**Table S1.** Univariable testing of individual variable association with regional GMV.

| Variable     | Hippocampus                       | Amygdala                           | Nucleus<br>Accumbens               | Pericalcarine       |
|--------------|-----------------------------------|------------------------------------|------------------------------------|---------------------|
| Age          | <b>R = -.57</b><br><b>p = .02</b> | <b>R = -.69</b><br><b>p = .003</b> | <b>R = -.66</b><br><b>p = .006</b> | R = -.26<br>p = .33 |
| Sex          | D = -.67<br>p = .22               | <b>D = -.92</b><br><b>p = .09</b>  | <b>D = -.97</b><br><b>p = .08</b>  | D = -.70<br>p = .17 |
| Education    | R = -.05<br>p = .85               | R = .16<br>p = .55                 | R = .005<br>p = .99                | R = .22<br>p = .41  |
| Age of Onset | R = -.42<br>p = .1                | R = -.4<br>p = .12                 | R = -.43<br>p = .1                 | R = -.03<br>p = .91 |
| BMI          | R = -.02<br>p = .94               | R = .22<br>p = .42                 | R = .11<br>p = .68                 | R = -.32<br>p = .23 |
| MMSE         | R = .07<br>p = .8                 | R = .04<br>p = .89                 | R = -.06<br>p = .83                | R = -.36<br>p = .16 |
| MADRS        | R = -.28<br>p = .29               | R = -.23<br>p = .39                | R = -.27<br>p = .31                | R = -.13<br>p = .64 |
| HAMD         | R = .08<br>p = .76                | R = .14<br>p = .61                 | R = .24<br>p = .36                 | R = -.02<br>p = .95 |

R=Pearson's correlation coefficient; D=Cohen's d; BMI = Body Mass Index; MMSE = Mini-Mental State Examination; MADRS = Montgomery-Åsberg Depression Rating Scale; HAMD = Hamilton Depression Rating Scale (24 item). P-values calculated by t-test or Pearson's correlation. Bolded: P-value less than 0.05 or absolute D-value greater than 0.8.
